# Supplementary material for: Combining Remote Sensing and Species Distribution Modelling to Assess Pinus hartwegii Response to Climate Change and Land Use from Izta-Popo National Park, Mexico
Source: MDPI journal article supplement (doi:10.3390/land10101037), 2021-10-02
Supplement: s1 [file s1]

**Supplementary Materials:** The following are available online at <https://www.mdpi.com/article/10.3390/land10101037/s1>, Figure S1: Non-Multidimensional Scaling, Figure S2: validation of Earth System Models, Figure 3: climate projections of coupled Earth System Models, Figure S4: model performances, Table S1: field observations coordinates, Table S2: weights of the explaining climatic variables in the best and worst modes, Table S2: ODMAP v1.0 standardized protocol of the species distribution modelling process [75], Table S3: Habitat Suitability Variation indexes. .

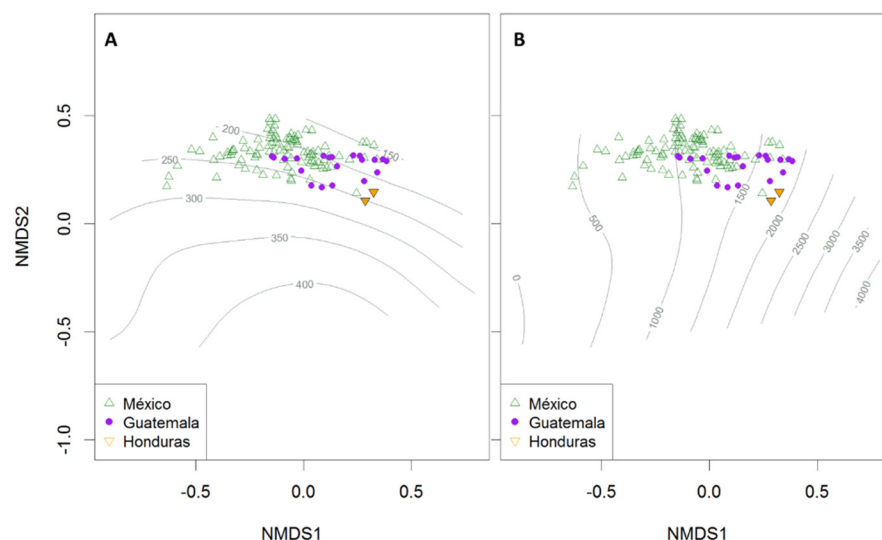

**Figure S1.** Non-Multidimensional Scaling (NMDS) for *Pinus hartwegii* México, Guatemala and Honduras presences represented over **A:** Bio 05 (maximum temperature of Warmest Month in  $^{\circ}\text{C}\times 10$ ), and **B:** Bio 12 (annual precipitation in mm).

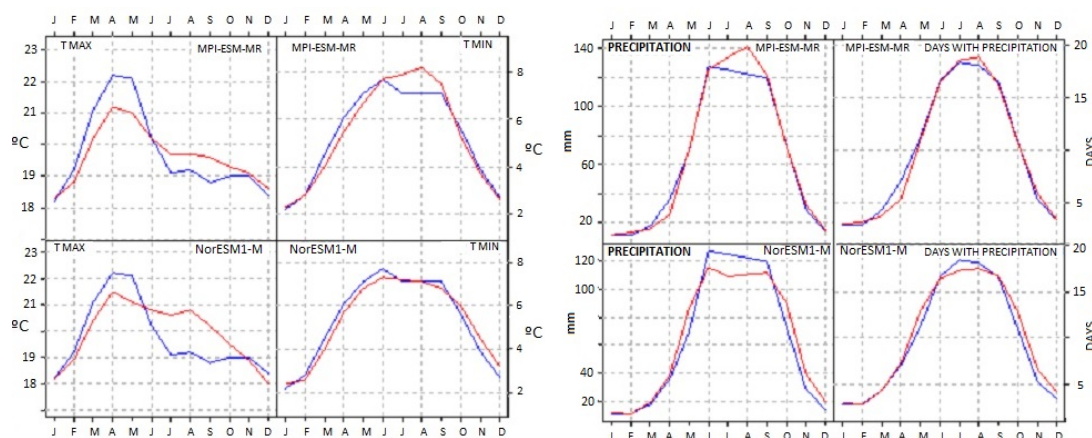

**Figure S2.** Validation of Earth System Models (red) with historical climatic data (blue) in Izta Popo National park. Meteorological stations used to reproduce present climate conditions are shown on Figure 1. Historical data: Mexican Meteorological Service (<https://smn.conagua.gob.mx/es/>; visited on October 2013). Methodology: [79]

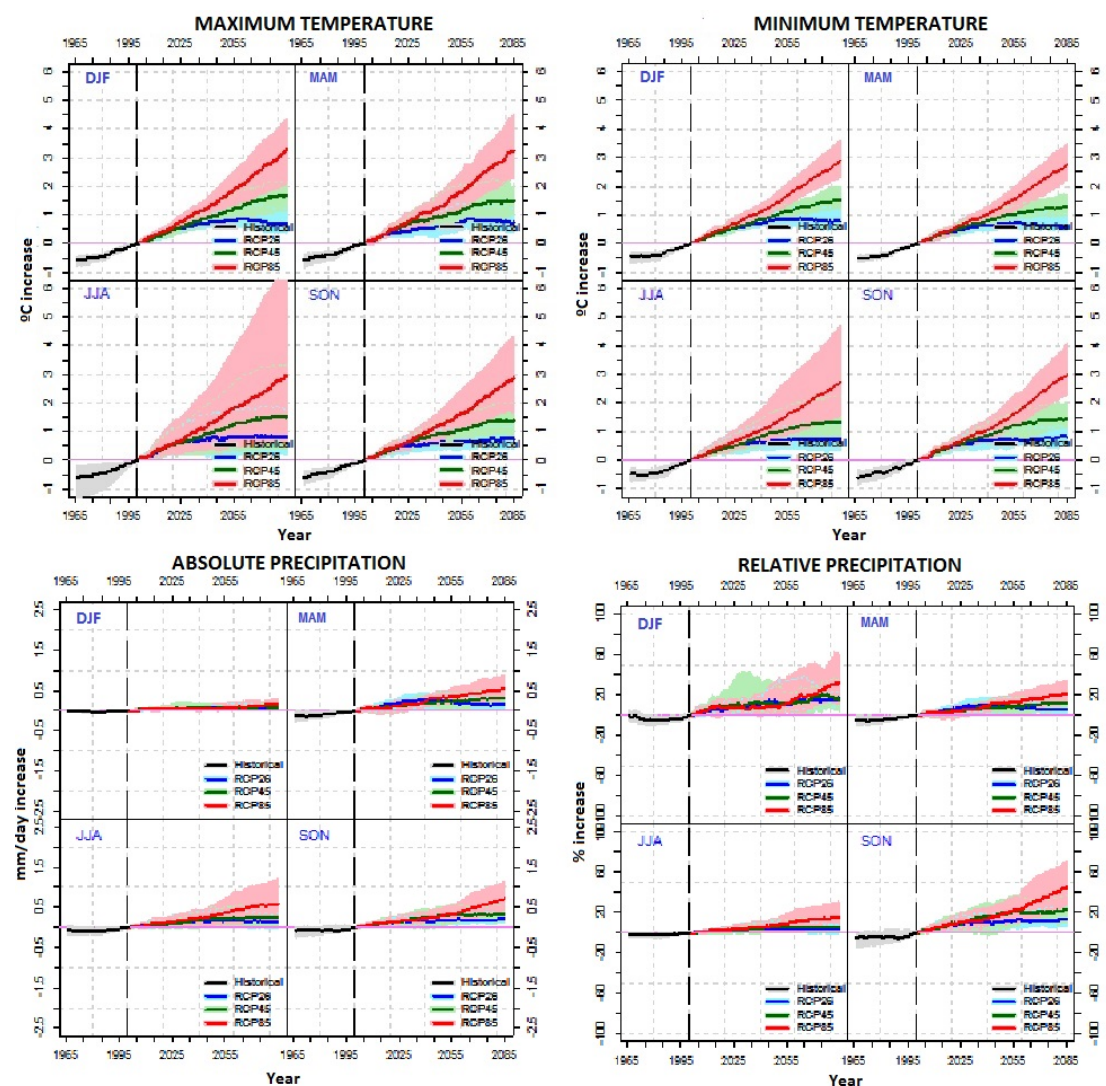

**Figure S3.** Climate projections of MPI-ESM-MR, NorESM1-M, GFDL-ESM2M and CanESM2 coupled Earth System Models in Izta Popo National Park. Blue, green and red lines: medians for RCP2.6, 4.5 and 8.5 respectively. Shaded areas: 10<sup>th</sup> to 90<sup>th</sup> percentiles respectively. Black line: Historical data of meteorological stations (Figure 1) Data from the Mexican Meteorological Service (<https://smn.conagua.gob.mx/es/>; visited on October 2013). DJF: December, January, February. MAM: March, April, May. JJA: June, July, August. SON: September, October, November. Methodology: [79]

For the four seasons (dry season, Nov.–Apr., and the three periods of the wet season), simulated precipitation for the twenty-first century displayed as relative increase compared to the amount simulated for the 1976–2005 Historical period. The vertical dotted line marks the end of the Historical data (2005). Data grouped for every RCP simulation of every global climate model selected and for the last 30 years of every station. T values are displayed Ribalaygua..

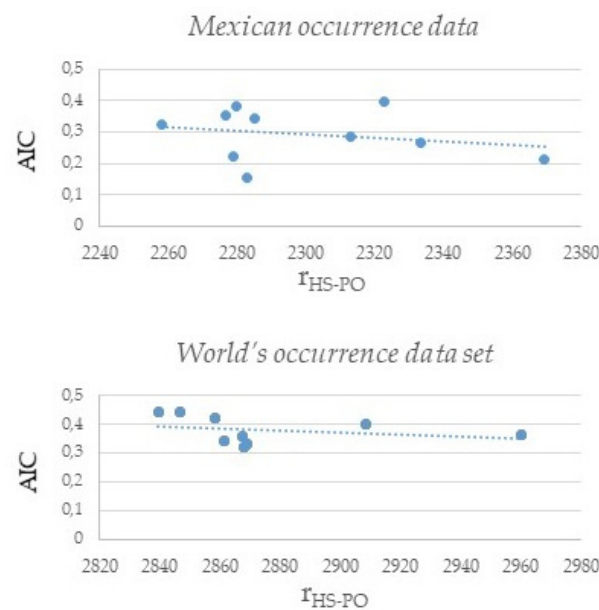

**Figure S4.** Akaike Information Criterion (AIC) and Pearson correlation coefficient between the habitat suitability and *P. hartwegii* occupation ( $r_{HS-PO}$ ) performances of the models fitted with the Mexican occurrence data set (set 1- upper figure) and the 1 world's occurrence data set (set 2- lower figure) after removing the most complex models (AIC>3000)

**Table S1.** Field observations points (X, Y coordinates -WGS84- and altitude) used to assess the pre-defined classes (vegetation types) where *Pinus hartwegii* participates (visited on September 2011 to March 2012).

| <b>Vegetation types</b>   | <b>X</b> | <b>Y</b> | <b>Altitude (m a.s.l.)</b> |
|---------------------------|----------|----------|----------------------------|
| Pino-Encino-Oyamel forest | 534414   | 2135083  | 3,403                      |
| Pino-Encino-Oyamel forest | 534104   | 2134946  | 3,311                      |
| Pino-Encino-Oyamel forest | 533717   | 2134800  | 3,310                      |
| Pine forest               | 533902   | 2134477  | 3,292                      |

**Table S2.** Standardized protocol of the species distribution modelling process, following the ODMAP v1.0 [Zurell et al., 2020] Date: 2021-09-09

#### Overview

##### Authorship

Contact : ignacio.garciaamoren@upm.es

Study link: Manuscript ID: land-1348076

Model objective

Model objective: Forecast and transfer

Target output: continuous habitat suitability index

Focal Taxon

Focal Taxon: *Pinus hartwegii* Lindl.

Location

Location: Izta Popo National Park, Mexico

Scale of Analysis

Spatial extent: 98.58219, 98.77804, 18.46929, 18.99345 (xmin, xmax, ymin, ymax)

Spatial resolution: 1

Temporal extent: 2050/2070

Temporal resolution: 20 years

Biodiversity data

Observation type: standardised monitoring data

Response data type: presence-only

Hypotheses

Hypotheses: Accordingly to regional scale analysis of many plant species, *P. hartwegii* distributions follow a climatic gradient (as also observed on local vegetation maps).

Assumptions

Model assumptions: Occurrences are reported without errors; All relevant drivers are included in the model; Predictor variables are estimated without errors; Species is in pseudo-equilibrium with the environment; the entire realised niche is encompassed by data; correlation structure between predictors does not change with time; the model extrapolates in a biological sensible manner

Algorithms

Modelling techniques: maxent

Model complexity: Different calibration options are included in the analysis (auto-features, LQP; Beta = 0,1,5; two sets of explanatory variables

Model averaging: None

Workflow

Model workflow: Twenty-four SDMs were fitted for present climate conditions combining two sets of current occurrence data and different levels of complexity. Occurrence coincidences in 1 km pixels were aggregated, and ecological outliers were discarded after performing non-metric multidimensional scaling (NMDS) ecological analysis of their annual and seasonal related precipitations and temperatures. 10,000 background points randomly selected in the studied area were used to build all the models. The selection of climatic variables was based on a stepwise selection following a physiologically-relevant criteria among the less correlated variables (Pearson  $r < 0.75$ ; variance inflation factor  $< 5$ ). The models were calibrated with 70% of occurrence data, random selected. The remaining 30% were reserved to perform a usual non-independent validation AUC statistic (Area Under the receiver operating characteristic curve), and by calculating the Pearson correlation coefficient between the habitat suitability values and the ad-hoc production of a *P. hartwegii* remote sensing data based map. To account for the goodness of fit and the model complexity, the AICc was calculated.

Software

Software: Maxent modeling algorithm version 3.3.3k (Phillips et al., 2006); ENMtools (Warren et al., 2010), for AICc calculations. Vegan Package (Oksanen et al., 2016) for NMDS analysis

Code availability: ENMtools: <https://doi.org/10.1111/j.1600-0587.2009.06142.x>; Vegan package: <https://cran.r-project.org/web/packages/vegan/index.html>

Data availability: <http://www.worldclim.org/>

## Data

Biodiversity data

Taxon names: *Pinus hartwegii* Lindl., Pinaceae

Taxonomic reference system: GBIF Backbone Taxonomy

Ecological level: species

Data sources: Mexican Forest Inventory (provided by the Comisión Nacional Forestal - CONAFOR); Atlas of the world's conifer (Farjon & Filer, 2013), provided by Farjon, A.

Sampling design: Uniform design in CONEFOR; Random in Farjon & Filer (2013)

Sample size: Sample size unknown

Clipping: Mexico; Mexico, Guatemala & Honduras

Cleaning: Poorly georeferenced data were removed, occurrence coincidences in 1 km pixels were aggregated, and ecological outliers were discarded after performing non-metric multidimensional scaling (NMDS) ecological analysis of their annual and seasonal related precipitations and temperatures

Background data: 10,000 background points randomly selected

Errors and biases: Unknown geographical precision in Farjon's data

Data partitioning

Training data: 70% random selection of occurrence data for model training

Validation data: cross-validation with remaining 30% occurrence data

Predictor variables

Predictor variables: BIO1-BIO19

Data sources: <http://www.worldclim.org/>; accessed in 2014

Temporal extent: 1950–2000

Dimension reduction: stepwise selection following a physiologically-relevant criteria among the less correlated variables (Pearson  $r < 0.75$ ; variance inflation factor  $< 5$ )

Transfer data

Data sources: MPI: <https://doi.org/10.1002/jame.20023>; NorESM1-M: [http://www.worldclim.org/Cmip5\\_30s](http://www.worldclim.org/Cmip5_30s) (accessed on 01 Oct 2014)

Spatial resolution: 30 arc-second

Temporal extent: 2050/2070 (20 yr)

Models and scenarios: ESMs: NorESM1-M & MPI-ESM-MR; Scenarios: RCP2.6, RCP4.5 and RCP8.5

### Model

Variable pre-selection

Variable pre-selection: Stepwise selection following a physiologically-relevant criteria among the less correlated variables (Pearson  $r < 0.75$ )

Multicollinearity

Multicollinearity: Variance inflation factor  $< 5$

Model selection - model averaging - ensembles

Model selection: (a) Pearson correlation coefficient between the habitat suitability values and the ad-hoc production of a *P. hartwegii* remote sensing data based map. (b) The goodness of fit and the model complexity (AICc)

Analysis and Correction of non-independence

Threshold selection

Threshold selection: “Maximum test sensitivity plus specificity”, “10 percentile training presence”, “0.25 habitat suitability threshold”, and “0.5 habitat suitability threshold”

### Assessment

Performance statistics

Performance on training data: AIC

Performance on validation data: AUC

Prediction

Prediction output

Prediction unit: km

**Table S2.** Weights of the explaining climatic variables in the best (model 5) and worst model (model 20).

| Model number | Variable | Percent contribution |
|--------------|----------|----------------------|
| 5            | Bio 5    | 70                   |
|              | Bio 8    | 12.8                 |
|              | Bio 9    | 10.4                 |
|              | Bio 6    | 2.6                  |
|              | Bio 12   | 2.4                  |
|              | Bio 15   | 1.7                  |
|              | Bio 18   | 0.1                  |
| 20           | Bio 5    | 94.4                 |
|              | Bio 9    | 3.3                  |
|              | Bio 1    | 1.2                  |
|              | Bio 17   | 0.8                  |
|              | Bio 15   | 0.3                  |
|              | Bio 12   | 0.1                  |

**Table S3.** *Pinus hartwegii* Habitat Suitability Variation index (HSV) of Maxent model number 5, for 2050 and 2070 averaged time period (t). NorESM1-M (Nor) and MPI-ESM-MR (MPI) future climatic models and different CO<sub>2</sub> Concentration pathways (RCP). Shadowed in grey: HSV of the 0.5 threshold.

| t    | Climate model | RCP | Threshold | HSV (%) | t    | Climate model | RCP | Threshold | HSV (%) |
|------|---------------|-----|-----------|---------|------|---------------|-----|-----------|---------|
| 2050 | MPI           | 2.6 | 0.25      | 0.404   | 2070 | MPI           | 2.6 | 0.25      | 0.202   |
|      |               |     | 0.5       | -5.945  |      |               |     | 0.5       | -6.359  |
|      |               |     | 10p       | -0.000  |      |               |     | 10p       | 0.000   |
|      |               |     | max       | -0.000  |      |               |     | max       | 0.000   |
|      |               | 4.5 | 0.25      | 0.202   |      |               | 4.5 | 0.25      | 0.000   |
|      |               |     | 0.5       | -18.663 |      |               |     | 0.5       | -20.319 |
|      |               |     | 10p       | 0.000   |      |               |     | 10p       | 0.000   |
|      |               |     | max       | 0.000   |      |               |     | max       | 0.000   |
|      |               | 8.5 | 0.25      | -2.424  |      |               | 8.5 | 0.25      | -18.038 |
|      |               |     | 0.5       | -23.188 |      |               |     | 0.5       | -43.744 |
|      |               |     | 10p       | 0.000   |      |               |     | 10p       | -9.399  |
|      |               |     | max       | 0.000   |      |               |     | max       | 0.000   |
|      | Nor           | 2.6 | 0.25      | 0.404   |      | Nor           | 2.6 | 0.25      | 0.404   |
|      |               |     | 0.5       | -5.945  |      |               |     | 0.5       | -7.187  |
|      |               |     | 10p       | 0.000   |      |               |     | 10p       | 0.000   |
|      |               |     | max       | 0.000   |      |               |     | max       | 0.000   |
|      |               | 4.5 | 0.25      | 0.404   |      |               | 4.5 | 0.25      | 0.202   |
|      |               |     | 0.5       | -13.753 |      |               |     | 0.5       | -16.622 |
|      |               |     | 10p       | 0.000   |      |               |     | 10p       | 0.000   |
|      |               |     | max       | 0.000   |      |               |     | max       | 0.000   |
|      |               | 8.5 | 0.25      | 0.000   |      |               | 8.5 | 0.25      | -8.225  |
|      |               |     | 0.5       | -17.243 |      |               |     | 0.5       | -32.032 |
|      |               |     | 10p       | 0.000   |      |               |     | 10p       | -2.817  |
|      |               |     | max       | 0.000   |      |               |     | max       | 0.000   |
